# Supplementary material
Source: PubMed Central journal article supplement (PMC6653792)
Supplement: Supp_References.pdf [file Supp_References.pdf]

## References for the Supplementary Tables

- S1. National Center for Injury Prevention and Control (2003). *Report to Congress on Mild Traumatic Brain Injury in the United States: Steps to Prevent a Serious Public Health Problem*. Centers for Disease Control and Prevention: Atlanta, GA.
- S2. Faul, M., XU, L., Wald, M.M., and Coronado, V.G. (2010). *Traumatic Brain Injury in the United States: Emergency Department Visits, Hospitalizations and Deaths 2002–2006*. Centers for Disease Control and Prevention; National Center for Injury Prevention and Control; Atlanta, GA.
- S3. Carroll, C.P., Cochran, J.A., Guse, C.E., and Wang, M.C. (2012). Are we underestimating the burden of traumatic brain injury? Surveillance of severe traumatic brain injury using centers for disease control International classification of disease, ninth revision, clinical modification, traumatic brain injury codes. *Neurosurgery* 71, 1064–1070.
