# Supplementary material
Source: PubMed Central journal article supplement (PMC6653792)
Supplement: Supp_Table1.pdf [file Supp_Table1.pdf]

## Supplementary Data

SUPPLEMENTARY TABLE S1. PCS SYMPTOMS IN THE EHR WERE CAPTURED BY ICD-9 AND ICD-10 BILLING CODES, AND BY KEYWORD SEARCHES OF CLINICAL NOTES AND PROBLEM LISTS

| <i>Post-concussion symptom</i> | <i>ICD-9 Codes</i>                                                                                                                                                                                                                                             | <i>ICD-10 Codes</i>                                                                                                                                  | <i>Keywords</i>                             |
|--------------------------------|----------------------------------------------------------------------------------------------------------------------------------------------------------------------------------------------------------------------------------------------------------------|------------------------------------------------------------------------------------------------------------------------------------------------------|---------------------------------------------|
| Anxiety                        | 799.21, 300                                                                                                                                                                                                                                                    | R45.0, F41.1, F41.9, F41.0, F40.9                                                                                                                    | Anxious, anxiety, nervous, panic            |
| Apathy                         | 799.25                                                                                                                                                                                                                                                         | R45.3                                                                                                                                                | Apathy                                      |
| Depression                     | 311                                                                                                                                                                                                                                                            | F32.9                                                                                                                                                | Depressed, depression                       |
| Concentration difficulties     | 799.5                                                                                                                                                                                                                                                          | R41.84                                                                                                                                               |                                             |
| Dizziness                      | 780.4                                                                                                                                                                                                                                                          | R42                                                                                                                                                  | Dizzy, dizziness, lightheaded, light-headed |
| Emotional lability             | 799.24                                                                                                                                                                                                                                                         | R45.86                                                                                                                                               | Emotional                                   |
| Fatigue                        | 780.7                                                                                                                                                                                                                                                          | R53.1, R53.8                                                                                                                                         | Tired, fatigue                              |
| Headache                       | 339.2, 784.0                                                                                                                                                                                                                                                   | G44.3, R51                                                                                                                                           | Headache                                    |
| Irritable                      | 799.22                                                                                                                                                                                                                                                         | R45.4                                                                                                                                                | Irritable, anger, angry                     |
| Impulsive                      | 799.23                                                                                                                                                                                                                                                         | R45.87                                                                                                                                               | Impulsive, impulsiveness, impulsivity       |
| Memory difficulties            | 780.93                                                                                                                                                                                                                                                         | R41.2, R41.3                                                                                                                                         | Memory, remember, amnesia                   |
| Sleep difficulties             | 780.50, 780.52, 780.54, 780.55, 780.59                                                                                                                                                                                                                         | F51.8, G47.00, G47.10, G47.8, G47.9                                                                                                                  | Sleep, insomnia                             |
| Other                          | 799.29 (Other signs and symptoms involving emotional state), 308.9 (Acute stress reaction, unspecified), 907.0 (Late effect of intracranial injury without skull or facial fracture), 905.0 (Late effect of intracranial injury with skull or facial fracture) | R45.89 (Other symptoms and signs involving emotional state), F43.0 (Acute stress reaction), R45.7 (State of emotional shock and stress, unspecified) |                                             |

Codes included all sub-classifications.

PCS, post-concussion syndrome; EHR, electronic health records; ICD, International Classification of Diseases.
