# Supplementary material
Source: PubMed Central journal article supplement (PMC6653792)
Supplement: Supp_Table2.pdf [file Supp_Table2.pdf]

SUPPLEMENTARY TABLE S2. mTBI BILLING CODES USED TO SELECT PATIENTS BY THE NLP ALGORITHM

| <i>Code Type</i> | <i>mTBI Codes</i> | <i>Definition</i>                                                                                              |
|------------------|-------------------|----------------------------------------------------------------------------------------------------------------|
| ICD-9            | 800.0             | Fracture of vault of skull, closed without mention of intracranial injury                                      |
| ICD-9            | 800.5             | Fracture of vault of skull, open without mention of intracranial injury                                        |
| ICD-9            | 801.0             | Fracture of base of skull, closed without mention of intracranial injury                                       |
| ICD-9            | 801.5             | Fracture of base of skull, open without mention of intracranial injury                                         |
| ICD-9            | 803.0             | Other and unqualified skull fracture, closed without mention in intracranial injury                            |
| ICD-9            | 803.5             | Other and unqualified skull fracture, open without mention in intracranial injury                              |
| ICD-9            | 804.0             | Multiple fractures involving skull or face with other fractures, closed without mention of intracranial injury |
| ICD-9            | 804.5             | Multiple fractures involving skull or face with other fractures, open without mention of intracranial injury   |
| ICD-9            | 850.0             | Concussion with no loss of consciousness                                                                       |
| ICD-9            | 850.1             | Concussion with brief loss of consciousness                                                                    |
| ICD-9            | 850.5             | Concussion with loss of consciousness of unspecified duration                                                  |
| ICD-9            | 850.9             | Concussion, unspecified                                                                                        |
| ICD-9            | 854.0             | Intracranial injury of other and unspecified nature                                                            |
| ICD-9            | 959.0             | Head injury, unspecified                                                                                       |
| ICD-10           | S02.0             | Fracture of vault of skull                                                                                     |
| ICD-10           | S02.1             | Fracture of base of skull                                                                                      |
| ICD-10           | S02.9             | Fracture of unspecified skull and facial bones                                                                 |
| ICD-10           | S06.0             | Concussion                                                                                                     |
| ICD-10           | S06.1             | Traumatic cerebral edema                                                                                       |
| ICD-10           | S06.8             | Other specified intracranial injury                                                                            |
| ICD-10           | S06.9             | Unspecified intracranial injury                                                                                |
| ICD-10           | S09.7             | Other unspecified injuries of head                                                                             |
| ICD-10           | T02.0             | Fractures involving head with neck                                                                             |
| ICD-10           | T06.0             | Injuries of brain and cranial nerves with injuries of nerves and spinal cord at neck level                     |
| ICD-10           | S09.8             | Other unspecified injuries of head                                                                             |
| ICD-10           | S09.9             | Other unspecified injuries of head                                                                             |
| ICD-10           | T90.2             | Sequelae of injuries to the head                                                                               |
| ICD-10           | T90.4             | Sequelae of injuries to the head                                                                               |
| ICD-10           | T90.5             | Sequelae of injuries to the head                                                                               |
| ICD-10           | T90.8             | Sequelae of injuries to the head                                                                               |
| ICD-10           | T90.9             | Sequelae of injuries to the head                                                                               |
| ICD-10           | T90.1             | Sequelae of injuries to the head                                                                               |

ICD-9 mTBI codes were endorsed by the National Center for Injury Prevention and Control,<sup>1</sup> and were mapped to ICD-10 codes using an internal Vanderbilt University Medical Center crosswalk tool (<https://terminology.mc.vanderbilt.edu/ctssearch/ctssearch.htm>). Codes included all sub-classifications.

mTBI, mild traumatic brain injury; NLP, natural language processing; ICD, International Classification of Diseases.
