# Supplementary material
Source: PubMed Central journal article supplement (PMC6653792)
Supplement: Supp_Table3.pdf [file Supp_Table3.pdf]

SUPPLEMENTARY TABLE S3. TBI BILLING CODES USED TO IDENTIFY HEAD INJURIES OF ALL SEVERITY  
IN PATIENTS SELECTED BY THE NLP AND CODED ALGORITHMS

| <i>TBI morbidity group</i>         | <i>ICD-9 Codes</i>                                                                                                         | <i>ICD-10 Codes</i>                                                                                                                                                              |
|------------------------------------|----------------------------------------------------------------------------------------------------------------------------|----------------------------------------------------------------------------------------------------------------------------------------------------------------------------------|
| Any TBI                            | 800.0–801.9, 803.0–804.9, 850.0–854.1, 950.1–950.3, or 959.01                                                              | S01.0-S01.9, S02.0, S02.1, S02.3, S02.7-S02.9, S04.0, S06.0-S06.9, S07.0, S07.1, S07.8, S07.9, S09.7-S09.9, T01.0, T02.0, T04.0, T06.0, T90.1, T90.2, T90.4, T90.5, T90.8, T90.9 |
| Skull fracture                     | 800–801.9, 803.0–804.9                                                                                                     | S02.0, S02.1, S02.3, S02.7, S02.8, S02.9                                                                                                                                         |
| Contusion                          | 800.1, 800.6, 801.1, 801.6, 803.1, 803.6, 804.1, 804.6, 851.0, 851.1, 851.4, 851.5, 851.8, 851.9                           | S06.1, S06.2, S06.3, S06.8, S06.9                                                                                                                                                |
| Hemorrhage                         | 800.2, 800.3, 800.7, 800.8, 801.2, 801.3, 801.7, 801.8, 803.2, 803.3, 803.7, 803.8, 804.2, 804.3, 804.7, 804.8, 852, 853.1 | S06.4, S06.5, S06.6 (S06*?)                                                                                                                                                      |
| Concussion / loss of consciousness | 850.1, 850.2, 850.3, 850.4, 850.5, 850.9                                                                                   | S06.0                                                                                                                                                                            |
| Other and unspecified head injury  | All remaining TBI codes                                                                                                    | All remaining TBI codes                                                                                                                                                          |

Codes were endorsed by the National Center for Injury Prevention and Control<sup>1,2</sup> and were mapped to TBI morbidity groups as previously published.<sup>3</sup> In NLP patients, the TBI morbidity group was assigned by mapping the eligible mild TBI; in coded cases, all TBI codes within 365 days before and 30 days after the first post-concussion syndrome billing code were mapped. Codes included all sub-classifications.

TBI, traumatic brain injury; NLP, natural language processing; ICD, International Classification of Diseases.
