# Supplementary material
Source: PubMed Central journal article supplement (PMC6653792)
Supplement: Supp_Table4.pdf [file Supp_Table4.pdf]

SUPPLEMENTARY TABLE S4. BILLING CODES INDICATIVE OF CONFOUNDING NEUROLOGICAL DISEASE

| <i>Description</i>          | <i>ICD-9 Codes</i>                   | <i>ICD-10 Codes</i>                           |
|-----------------------------|--------------------------------------|-----------------------------------------------|
| Brain tumor                 | 191, 192.1, 225, 225.0, 225.1, 225.2 | C71, C70.0, D32.0, D33.0, D33.1, D33.2, D33.3 |
| Stroke                      | 434, 433                             | I63, I60, I61, I62                            |
| Seizures                    | 345, 780.39                          | G40, R56.9                                    |
| Meningitis                  | 320, 321, 322, 323                   | G00, G01, G02, G03, G04, G05                  |
| Intracranial abscess        | 324                                  | G06.0, G06.2                                  |
| Multiple sclerosis          | 340                                  | G35                                           |
| Alzheimer's disease         | 331.0                                | G30                                           |
| Parkinson's disease         | 332                                  | G20                                           |
| Other cerebral degeneration | 330.9, 331.1–331.9                   | G31, G32                                      |

Codes included all sub-classifications.  
 ICD, International Classification of Diseases.
