# Supplementary material
Source: PubMed Central journal article supplement (PMC6653792)
Supplement: Supp_Table5.pdf [file Supp_Table5.pdf]

SUPPLEMENTARY TABLE S5. BILLING AND PROCEDURE CODES USED TO CAPTURE BRAIN IMAGING

| <i>Description</i> | <i>ICD-9 Codes</i> | <i>ICD-10 Codes</i> | <i>Current procedural terminology codes</i>                                                                        |
|--------------------|--------------------|---------------------|--------------------------------------------------------------------------------------------------------------------|
| Brain imaging      | ICD-9 88.91        | ICD-10 B0300Y0Z     | 70250, 70260, 70450, 70460, 70470, 70544, 70545, 70546, 70551, 70552, 70553, 70554, 70555, 70557, 70558, and 70559 |

In natural language processing patients, codes had to occur within 7 days after the eligible mild traumatic brain injury; in coded cases, codes had to occur within 365 days before and 30 days after the first post-concussion syndrome code. Codes included all sub-classifications. ICD, International Classification of Diseases.
