# Supplementary material
Source: PubMed Central journal article supplement (PMC6653792)
Supplement: Supp_Table6.pdf [file Supp_Table6.pdf]

SUPPLEMENTARY TABLE S6. INJURY CAUSES WERE ASSIGNED BY MAPPING ICD-9 AND ICD-10  
EXTERNAL CAUSE CODES AS PREVIOUSLY PUBLISHED<sup>2</sup>

| <i>Injury cause</i>     | <i>ICD-9 codes</i>    | <i>ICD-10 codes</i>                                                                                                                                                  |
|-------------------------|-----------------------|----------------------------------------------------------------------------------------------------------------------------------------------------------------------|
| Motor vehicle collision | E810-819              | V02-V04 (.1, .9), V09.2, V12-V14 (.3-.9), V19 (.4-.6), V20-V28 (.3-.9), V29 (.4-.9), V30-V79 (.4-.9), V80 (.3-.5), V81.1, V82.1, V83-V86 (.0-.3), V87 (.0-.8), V89.2 |
| Falls                   | E880-E886, E888, E897 | W00-W19, Y30                                                                                                                                                         |
| Assault                 | E960-E969             | X85-Y09, Y87.1                                                                                                                                                       |
| Struck by and against   | E916, E917            | W20-W22, W50-W52, Y29                                                                                                                                                |

In natural language processing patients, the external cause code on or up to 30 days after the eligible mild traumatic brain injury was mapped; in coded cases, the external cause code assigned closest in time to the first post-concussion syndrome code, within the window of 365 days before and 30 days after, was mapped. Codes included all sub-classifications.

ICD, International Classification of Diseases.
