# Supplementary material
Source: PubMed Central journal article supplement (PMC6653792)
Supplement: Supp_Table7.pdf [file Supp_Table7.pdf]

SUPPLEMENTARY TABLE S7. COMORBIDITIES

| <i>Description</i>  | <i>ICD-9</i>                   | <i>ICD-10</i>                  |
|---------------------|--------------------------------|--------------------------------|
| ADHD                | 314                            | F90                            |
| Anxiety             | 300, 313.0                     | F40, F41, F42                  |
| Depression          | 311, 296.2, 296.3              | F32, F33                       |
| Learning disability | 315                            | F80, F81                       |
| Migraines           | 346, 339.0–339.1, 339.4, 339.8 | G43, G44.0–G44.2, G44.5, G44.8 |
| PTSD                | 309.81                         | F43.1                          |

ICD, International Classification of Diseases; ADHD, attention deficit hyperactivity disorder; PTSD, post-traumatic stress disorder.
