# Supplementary material
Source: PubMed Central journal article supplement (PMC6653792)
Supplement: Supp_Table8.pdf [file Supp_Table8.pdf]

SUPPLEMENTARY TABLE S8. CHARACTERISTICS OF CODED CASES STRATIFIED BY THE PRESENCE OR ABSENCE OF TBI BILLING CODES AND BY THE DENSITY OF PCS BILLING CODES

|                                                          | <i>Coded cases<br/>(n=1142)</i> | <i>Coded cases<br/>with an<br/>TBI code<br/>(n=706)</i> | <i>Coded cases<br/>without an<br/>TBI code<br/>(n=436)</i> | <i>Coded cases<br/>with an<br/>mTBI code<br/>(n=536)</i> | <i>Coded cases<br/>with a<br/>moderate/ severe<br/>TBI code<br/>(n=170)</i> | <i>Coded cases<br/>with at<br/>least 14<br/>days between<br/>first and<br/>last PCS<br/>codes (n=808)</i> |
|----------------------------------------------------------|---------------------------------|---------------------------------------------------------|------------------------------------------------------------|----------------------------------------------------------|-----------------------------------------------------------------------------|-----------------------------------------------------------------------------------------------------------|
| Female gender, <i>n</i> (%)                              | 571 (50.0)                      | 331 (46.9)                                              | 240 (55.0)                                                 | 272 (50.7)                                               | 59 (34.7)                                                                   | 435 (53.8)                                                                                                |
| Age, mean (SD) <sup>a</sup>                              | 34.1 (18.4)                     | 31.4 (18.0)                                             | 38.4 (18.1)                                                | 30.9 (17.6)                                              | 33.1 (19.0)                                                                 | 35.3 (18.0)                                                                                               |
| Pediatric (< 18 years of age), <i>n</i> (%) <sup>a</sup> | 294 (25.7)                      | 228 (32.3)                                              | 66 (15.1)                                                  | 181 (33.8)                                               | 47 (27.6)                                                                   | 189 (23.4)                                                                                                |
| TBI code and morbidity group, <i>n</i> (%) <sup>b</sup>  | 706 (61.8)                      | 706 (100)                                               | 0 (0)                                                      | 536 (100)                                                | 170 (100)                                                                   | 449 (55.6)                                                                                                |
| Skull fracture                                           | 94 (8.2)                        | 94 (13.3)                                               | 0 (0)                                                      | 0 (0)                                                    | 94 (55.3)                                                                   | 39 (4.8)                                                                                                  |
| Contusion                                                | 56 (4.9)                        | 56 (7.9)                                                | 0 (0)                                                      | 0 (0)                                                    | 56 (32.9)                                                                   | 28 (3.5)                                                                                                  |
| Hemorrhage                                               | 120 (10.5)                      | 120 (17.0)                                              | 0 (0)                                                      | 0 (0)                                                    | 120 (70.6)                                                                  | 58 (7.2)                                                                                                  |
| Concussion/loss of consciousness                         | 444 (38.9)                      | 444 (62.9)                                              | 0 (0)                                                      | 299 (55.8)                                               | 145 (85.3)                                                                  | 261 (32.3)                                                                                                |
| Other and unspecified head injury                        | 560 (49.0)                      | 560 (79.3)                                              | 0 (0)                                                      | 430 (80.2)                                               | 130 (76.5)                                                                  | 337 (41.7)                                                                                                |
| Brain imaging, <i>n</i> (%)                              | 544 (47.6)                      | 474 (67.1)                                              | 70 (16.1)                                                  | 319 (59.5)                                               | 155 (91.2)                                                                  | 300 (37.1)                                                                                                |
| TBI cause, <i>n</i> (%)                                  |                                 |                                                         |                                                            |                                                          |                                                                             |                                                                                                           |
| Motor vehicle collision                                  | 246 (21.5)                      | 229 (32.4)                                              | 17 (3.9)                                                   | 141 (26.3)                                               | 88 (51.8)                                                                   | 112 (13.9)                                                                                                |
| Fall                                                     | 92 (8.1)                        | 86 (12.2)                                               | 6 (1.4)                                                    | 56 (10.4)                                                | 30 (17.6)                                                                   | 49 (6.1)                                                                                                  |
| Struck by and against                                    | 63 (5.5)                        | 58 (8.2)                                                | 5 (1.1)                                                    | 52 (9.7)                                                 | 6 (3.5)                                                                     | 45 (5.6)                                                                                                  |
| Assault                                                  | 20 (1.8)                        | 20 (2.8)                                                | 0 (0)                                                      | 8 (1.5)                                                  | 12 (7.1)                                                                    | 13 (1.6)                                                                                                  |
| Unknown                                                  | 721 (63.1)                      | 313 (44.3)                                              | 408 (93.6)                                                 | 279 (52.1)                                               | 34 (20.0)                                                                   | 589 (72.9)                                                                                                |
| PCS symptom codes <sup>c</sup>                           |                                 |                                                         |                                                            |                                                          |                                                                             |                                                                                                           |
| Any                                                      | 582 (51.0)                      | 343 (48.6)                                              | 239 (54.8)                                                 | 281 (54.2)                                               | 62 (36.5)                                                                   | 474 (58.7)                                                                                                |
| Anxiety                                                  | 61 (5.3)                        | 34 (4.8)                                                | 27 (6.2)                                                   | 32 (6.0)                                                 | 2 (1.2)                                                                     | 48 (5.9)                                                                                                  |
| Apathy                                                   | 0 (0)                           | 0 (0)                                                   | 0 (0)                                                      | 0 (0)                                                    | 0 (0)                                                                       | 0 (0)                                                                                                     |
| Depression                                               | 39 (3.4)                        | 21 (3.0)                                                | 18 (4.1)                                                   | 17 (3.2)                                                 | 4 (2.4)                                                                     | 30 (3.7)                                                                                                  |
| Concentration difficulties                               | 13 (1.1)                        | 10 (1.4)                                                | 3 (0.7)                                                    | 10 (1.9)                                                 | 0 (0)                                                                       | 11 (1.4)                                                                                                  |
| Dizziness                                                | 148 (13.0)                      | 84 (11.9)                                               | 64 (14.7)                                                  | 74 (13.8)                                                | 10 (5.9)                                                                    | 127 (15.7)                                                                                                |
| Emotional lability                                       | 0 (0)                           | 0 (0)                                                   | 0 (0)                                                      | 0 (0)                                                    | 0 (0)                                                                       | 0 (0)                                                                                                     |
| Fatigue                                                  | 11 (1.0)                        | 6 (0.8)                                                 | 5 (1.1)                                                    | 4 (0.7)                                                  | 2 (1.2)                                                                     | 9 (1.1)                                                                                                   |
| Headache                                                 | 364 (31.9)                      | 221 (31.3)                                              | 143 (32.8)                                                 | 183 (34.1)                                               | 38 (22.4)                                                                   | 291 (36.0)                                                                                                |
| Irritable                                                | 1 (0.1)                         | 1 (0.1)                                                 | 0 (0)                                                      | 1 (0.2)                                                  | 0 (0)                                                                       | 0 (0)                                                                                                     |
| Impulsive                                                | 0 (0)                           | 0 (0)                                                   | 0 (0)                                                      | 0 (0)                                                    | 0 (0)                                                                       | 0 (0)                                                                                                     |
| Memory difficulties                                      | 163 (14.3)                      | 88 (12.5)                                               | 75 (17.2)                                                  | 72 (13.4)                                                | 16 (9.4)                                                                    | 149 (18.4)                                                                                                |
| Sleep disturbances                                       | 32 (2.8)                        | 15 (2.1)                                                | 17 (3.9)                                                   | 13 (2.4)                                                 | 2 (1.2)                                                                     | 32 (4.0)                                                                                                  |
| Other                                                    | 31 (2.7)                        | 19 (2.7)                                                | 12 (2.8)                                                   | 7 (1.3)                                                  | 12 (7.1)                                                                    | 25 (3.1)                                                                                                  |

TBI, traumatic brain injury; PCS, post-concussion syndrome; mTBI, mild traumatic brain injury; SD, standard deviation.
