# Supplementary material
Source: PubMed Central journal article supplement (PMC6653792)
Supplement: Supp_Table9.pdf [file Supp_Table9.pdf]

SUPPLEMENTARY TABLE S9. PRE-INJURY DIAGNOSES IN CONTROLS AND CODED CASES STRATIFIED BY THE PRESENCE OR ABSENCE OF TBI BILLING CODES AND BY THE DENSITY OF PCS BILLING CODES

| <i>Diagnosis</i>                  | <i>NLP controls<br/>(n=10857)</i> | <i>Coded cases<br/>(n=1142)</i> | <i>Coded cases with an TBI code<br/>(n=706)</i> | <i>Coded cases without an TBI code<br/>(n=436)</i> | <i>Coded cases with an mTBI code<br/>(n=536)</i> | <i>Coded cases with a moderate/severe TBI code (n=170)</i> | <i>Coded cases with at least 14 days between first and last PCS codes (n=808)</i> |
|-----------------------------------|-----------------------------------|---------------------------------|-------------------------------------------------|----------------------------------------------------|--------------------------------------------------|------------------------------------------------------------|-----------------------------------------------------------------------------------|
| ADHD, <i>n (%)</i>                | 227 (2.1)                         | 24 (2.1)                        | 17 (2.4)                                        | 7 (1.6)                                            | 15 (2.8)                                         | 2 (1.2)                                                    | 15 (1.9)                                                                          |
| Anxiety, <i>n (%)</i>             | 560 (5.2)                         | 112 (9.8)                       | 64 (9.1)                                        | 48 (11.0)                                          | 57 (10.6)                                        | 7 (4.1)                                                    | 83 (10.3)                                                                         |
| Depression, <i>n (%)</i>          | 581 (5.4)                         | 101 (8.8)                       | 56 (7.9)                                        | 45 (10.3)                                          | 44 (8.2)                                         | 12 (7.1)                                                   | 70 (8.7)                                                                          |
| Learning disability, <i>n (%)</i> | 129 (1.2)                         | 19 (1.7)                        | 12 (1.7)                                        | 7 (1.6)                                            | 12 (2.2)                                         | 0 (0)                                                      | 12 (1.5)                                                                          |
| Migraine, <i>n (%)</i>            | 246 (2.3)                         | 117 (10.2)                      | 53 (7.5)                                        | 64 (14.7)                                          | 50 (9.3)                                         | 3 (1.8)                                                    | 107 (13.2)                                                                        |
| PTSD, <i>n (%)</i>                | 100 (0.9)                         | 27 (2.4)                        | 11 (1.6)                                        | 16 (3.7)                                           | 9 (1.7)                                          | 2 (1.2)                                                    | 20 (2.5)                                                                          |

Diagnoses (Supplementary Table 7) had to occur before the eligible mTBI in NLP patients, and before the first PCS billing code in coded patients. TBI, traumatic brain injury; PCS, post-concussion syndrome; NLP, natural language processing; ADHD, attention deficit hyperactive disorder; PTSD, post-traumatic stress disorder.
